# Supplementary material for: Epidemiological characteristics and factors affecting length of hospital stay for children and adults with burns in Zunyi, China: a retrospective study
Source: PeerJ. 2018 Oct 3;6:e5740. doi: 10.7717/peerj.5740 (PMC6173946; doi:10.7717/peerj.5740)
Supplement: Supplemental Information 1 — Original data including demographics, first aid and clinical data. [file peerj-06-5740-s001.xlsx]

## Sheet: Sheet1
id	group	censor	age	gender	residence	TBSA	degree of burn	site 1	site 2	site 3	site 4	site 5	site 6	complication	skin grifting	LOS	cost (RMB)	Inhalation injury	etiology	location	burnt time	season	inpatient time	activity	Cold water rinsing	Wound protection	External remedy used	outcome	Medical treatment≤24 h	etiology(two categories)
1166018	1	0	1.2	0	2	10	3	1	2	4				0	0	10	4900	0	1	1	2015-10-15	3	2015-10-15	2	1	1	3	2	0	1
977225	1	0	1.7	1	3	2	3	4						0	1	34	15533	0	3	1	2013-11-21	3	2013-12-11	2	1	1	3	2	1	1
984114	1	1	1.3	1	3	3	3	3						0	0	1	1016	0	1	1	2014-01-07	4	2014-01-07	2	1	1	3	2	0	1
991125	1	0	0.4	1	3	8	3	7	7					0	0	3	2138	0	1	1	2014-02-05	4	2014-02-05	4	1	2	3	2	0	1
993849	1	0	15	1	3	3	4	7						0	1	35	14586	0	3	2	2014-01-29	4	2014-02-13	2	1	1	3	2	0	1
1007317	1	0	1.5	1	2	17	4	7	7					0	0	2	3648	0	1	1	2014-03-26	1	2014-03-31	2	1	1	3	4	0	1
1008191	1	1	9	1	3	1	2	9						0	0	19	2676	0	5	1	2014-04-03	1	2014-04-03	2	1	1	3	1	0	0
1013553	1	0	16	0	3	3	4	3						0	1	15	9250	0	6	1	2014-02-22	4	2014-04-22	4	1	1	3	2	1	1
1022852	1	0	2.2	0	3	9	4	7						0	0	21	11508	0	1	1	2014-05-26	1	2014-05-26	2	1	2	3	2	0	1
1029250	1	1	6	1	3	1	4	4						0	1	29	26130	0	7	3	2014-06-17	2	2014-06-17	2	1	1	3	2	0	0
1029251	1	0	2.8	0	3	2	2	2						0	0	2	1079	0	7	1	2014-06-16	2	2014-06-17	2	1	1	3	1	1	0
1031944	1	0	4.4	1	3	1	2	9						0	0	6	847	0	5	1	2014-06-25	2	2014-06-26	2	1	1	3	1	0	0
1032207	1	0	10	1	3	2	3	4						0	0	11	5992	0	7	3	2014-06-27	2	2014-06-27	2	1	2	3	2	0	0
1032843	1	1	4	1	1	4	2	1						0	0	7	2009	0	3	3	2014-06-29	2	2014-06-30	2	1	1	3	1	1	1
1036449	1	0	2.3	0	3	11	3	2						0	0	5	1796	0	1	1	2014-07-10	2	2014-07-11	1	1	1	4	2	1	1
1039243	1	0	13	1	2	2	4	4	8					0	1	85	51789	0	7	3	2014-07-21	2	2014-07-21	2	1	1	3	3	0	0
1047405	1	0	0.6	0	3	6	3	7	7					0	0	2	1651	0	1	3	2014-08-16	2	2014-08-16	1	1	1	3	2	0	1
1051466	1	0	2.5	1	3	1	3	9						0	0	17	2889	0	7	3	2014-08-29	2	2014-08-30	2	2	1	3	1	0	0
1057464	1	0	0.9	0	1	6	3	7						0	0	137	388	0	1	1	2014-09-22	3	2014-09-22	2	1	1	3	2	0	1
1059039	1	1	1.1	1	1	1	3	4						1	0	12	3077	0	6	1	2014-09-16	3	2014-09-28	2	1	1	3	2	1	1
1059338	1	1	3.3	0	3	2	2	9	1					0	0	26	3898	0	7	3	2015-01-18	4	2015-01-18	2	1	1	3	1	0	0
1065682	1	1	2	0	1	1	4	4						0	0	1	758	0	7	3	2014-10-23	3	2014-10-23	2	1	1	3	2	0	0
1066173	1	0	5.2	1	3	2	2	4						0	0	3	1387	0	6	1	2014-10-18	3	2014-10-24	2	1	1	2	2	1	1
1068936	1	0	1.7	0	3	7	3	4	3	3				0	0	18	13880	0	1	1	2014-11-03	3	2014-11-03	2	1	2	4	2	0	1
1072409	1	0	1.7	1	2	4	3	1	1					0	0	3	1293	0	1	1	2014-11-15	3	2014-11-17	2	1	1	3	2	0	1
1077786	1	0	3.5	0	2	7	4	1	1					0	0	16	5066	0	3	1	2014-12-06	4	2014-12-06	2	1	2	3	2	0	1
1079076	1	0	12	1	2	27	3	1	1	2	3	2		1	0	60		1	3	1	2014-12-11	4	2014-12-11	4	1	1	3	3	0	1
1079535	1	0	1.7	1	3	4	3	1						0	0	6	3003	0	7	1	2014-12-11	4	2014-12-13	2	1	1	3	2	1	0
1081095	1	0	0.6	1	3	7	3	1						0	0	4	2081	0	6	1	2014-12-17	4	2014-12-18	4	1	1	3	2	0	1
1081528	1	0	2.3	0	3	8	4	1	1					0	0	24	5456	0	1	1	2014-12-20	4	2014-12-20	1	1	1	3	2	0	1
1081664	1	0	3.3	1	3	32	3	2	5	7	3			0	1	50	61067	0	1	1	2014-12-21	4	2014-12-21	2	1	2	3	2	0	1
1083310	1	1	1.7	1	2	6	4	5	6	7				0	0	13	11647	0	7	1	2014-12-27	4	2014-12-27	2	1	2	3	2	0	0
1083420	1	0	0.8	1	3	8	3	1	2	3				0	0	9	4855	0	1	1	2014-12-28	4	2014-12-28	1	1	2	3	2	0	1
1083424	1	0	7	1	3	1	2	9						0	0	1	235	0	2	1	2014-12-27	4	2014-12-28	3	1	1	3	1	1	1
1084108	1	0	2.8	1	3	28	3	2	5	3				0	1	41	53811	0	1	1	2014-12-30	4	2014-12-30	2	1	1	3	2	0	1
1084141	1	0	2.6	0	3	16	3	3	2	7				0	0	15	4721	0	1	1	2014-12-29	4	2014-12-31	2	1	1	3	2	1	1
1084675	1	0	5	1	3	1	2	9						0	0	2	340	0	7	3	2015-01-02	4	2015-01-02	2	1	1	3	1	0	0
1085291	1	0	2.6	0	2	20	4	2	5	7	7	8	7	0	0	11	15853	0	1	1	2015-01-05	4	2015-01-05	4	1	1	3	2	0	1
1089044	1	0	3	1	1	23	4	1	1	7	2			1	1	94	144876	1	3	1	2015-01-16	4	2015-01-16	2	1	1	3	2	0	1
1089045	1	0	2	1	3	26	4	1	1	3	2	7		1	1	94	139212	1	3	1	2015-01-16	4	2015-01-16	2	1	1	3	2	0	1
1090250	1	0	1.4	1	3	6	3	2	3	4	4	2		0	0	10	3948	0	1	1	2015-01-20	4	2015-01-20	4	1	1	3	2	0	1
1090647	1	0	3.3	0	3	12	3	7						1	0	7	3595	0	1	1	2015-02-07	4	2015-02-22	2	1	2	1	2	1	1
1091374	1	0	3.3	1	3	2	2	1						0	0	3	1245	0	3	3	2015-01-25	4	2015-01-25	2	1	1	3	1	0	1
1093536	1	0	2.7	0	3	7	3	8						0	0	12	5925	0	1	1	2015-01-29	4	2015-01-31	2	1	1	4	2	1	1
1095104	1	0	2.1	1	2	6	3	1	1	2	4			0	0	10	11226	0	1	1	2015-02-05	4	2015-02-06	2	1	2	1	2	1	1
1095279	1	0	1.9	0	3	17	3	5	7	7				0	0	16	16742	0	1	1	2015-02-06	4	2015-02-06	2	1	2	3	2	0	1
1095456	1	1	0.7	1	3	3	3	8	8					0	0	9	2692	0	1	1	2015-02-05	4	2015-02-05	4	1	1	3	2	0	1
1095530	1	0	2.2	1	3	8	2	1	1	1				0	0	5	2407	0	1	1	2015-02-25	4	2015-02-26	2	1	1	3	2	1	1
1095648	1	0	7	0	3	1	4	4						1	0	8	2528	0	1	1	2015-02-04	4	2015-02-07	2	1	1	3	2	0	1
1095837	1	0	6	1	2	4	3	1	4					0	0	7	4323	1	3	3	2015-02-08	4	2015-02-08	2	1	1	3	2	0	1
1096551	1	0	8	0	3	24	3	7	7	2	2	5	4	0	0	30	25117	0	1	1	2015-02-10	4	2015-02-10	3	1	2	3	2	0	1
1097860	1	1	13	0	3	5	3	1	4					0	0	9	3531	0	3	3	2015-02-17	4	2015-02-17	2	1	2	3	1	0	1
1098183	1	0	2.5	1	3	5	2	1	4					0	0	7	3572	0	3	3	2015-02-19	4	2015-02-19	2	1	1	3	2	0	1
1098359	1	0	8	1	3	2	3	1						0	0	1	887	0	3	1	2015-02-20	4	2015-02-20	2	1	1	3	2	0	1
1098375	1	1	0.6	0	2	4	3	2	7					0	0	8		0	1	1	2015-02-10	4	2015-02-21	4	1	1	3	2	0	1
1098482	1	0	4.1	1	3	6	2	1	1	2				0	0	4	1850	0	1	1	2015-02-21	4	2015-02-21	2	1	1	3	1	0	1
1098884	1	1	1.5	1	2	6	3	1	2					0	0	8	4755	0	1	1	2015-02-21	4	2015-02-23	2	1	1	3	2	0	1
1099139	1	1	4.5	0	3	6	3	1	1	2				0	0	7	5592	0	1	1	2015-02-21	4	2015-02-24	2	1	1	3	2	0	1
1100898	1	1	1.1	1	2	8	3	1	1	2				0	0	6	3649	0	1	1	2015-02-25	4	2015-02-28	2	1	1	3	2	0	1
1102469	1	0	1.4	1	3	9	3	7	7	5				0	1	34	22648	0	1	1	2015-03-05	1	2015-03-05	2	1	1	3	2	0	1
1102480	1	0	1.4	1	3	21	4	7	7	5	6			1	1	34	100562	0	1	1	2015-03-04	1	2015-03-05	2	1	1	3	2	0	1
1102775	1	1	2.2	0	3	9	3	1	4	7				0	0	18	8464	0	1	1	2015-03-06	1	2015-03-06	2	1	2	3	2	0	1
1103157	1	0	2.1	0	2	12	3	3	2	7				0	0	12	9795	0	1	1	2015-03-08	1	2015-03-08	2	1	1	3	2	0	1
1104306	1	0	2.2	1	3	10	3	8	7					0	0	15	5898	0	1	1	2015-03-11	1	2015-03-11	2	1	1	3	2	0	1
1104388	1	0	2.5	1	3	10	3	1	1	2	4			0	0	7	4364	0	1	1	2015-03-11	1	2015-03-11	2	1	1	3	2	0	1
1104766	1	0	6	1	2	3	3	1						0	0	6	2919	0	3	3	2015-03-12	1	2015-03-12	2	1	1	3	2	0	1
1105210	1	1	11	1	3	3	3	1						1	0	6	3176	0	3	3	2015-03-12	1	2015-03-14	2	1	1	3	2	1	1
1105403	1	1	4.9	1	3	4	3	1	4					0	0	8	5430	1	3	3	2015-03-15	1	2015-03-15	2	1	1	3	2	0	1
1106470	1	1	3	0	1	7	2	1	4					0	0	5	1876	0	3	3	2015-03-18	1	2015-03-18	2	1	1	3	2	0	1
1106556	1	0	1.3	0	3	2	3	1	4					0	0	5	2279	0	2	1	2015-03-18	1	2015-03-18	2	1	1	3	2	0	1
1106588	1	1	4.3	1	3	5	3	1	4					0	0	15	7231	0	3	3	2015-03-19	1	2015-03-19	2	1	1	3	2	0	1
1107039	1	1	1.8	1	1	3	3	3						0	0	12	4366	0	1	1	2015-03-20	1	2015-03-20	2	1	2	3	2	0	1
1107495	1	0	13	1	2	4	3	1	4					0	0	9	5033	0	3	3	2015-03-22	1	2015-03-22	4	1	1	3	1	0	1
1107527	1	1	7	1	3	5	2	1	4					0	0	4	2819	0	3	3	2015-03-22	1	2015-03-22	2	1	1	3	2	0	1
1108402	1	0	0.6	1	3	6	2	4	7	7				0	0	16	3600	0	1	1	2015-03-25	1	2015-03-25	4	1	2	3	1	0	1
1108847	1	1	2.4	1	3	3	2	1	2					0	0	4	2204	0	1	1	2015-03-26	1	2015-03-26	1	1	2	3	1	0	1
1109404	1	0	1.5	0	3	21	3	7	7	5	2			1	1	58	66803	0	1	1	2015-03-28	1	2015-03-28	2	1	1	3	2	0	1
1110933	1	0	2.5	0	3	8	4	3	7					0	0	18	7837	0	1	1	2015-03-29	1	2015-04-02	2	1	1	1	2	1	1
1111347	1	0	1.5	1	3	2	4	5						0	0	6	1385	0	3	1	2015-04-03	1	2015-04-04	2	1	1	3	2	1	1
1112712	1	0	1.8	1	3	10	3	3	2					0	0	26	16597	0	1	1	2015-04-08	1	2015-04-08	2	1	1	3	2	0	1
1114575	1	0	4.3	0	1	4	2	1	4					0	0	2	846	0	3	1	2015-04-15	1	2015-04-15	2	1	2	1	2	0	1
1116694	1	0	0.9	1	2	9	3	3	7	5				0	0	8	5605	0	1	1	2015-04-22	1	2015-04-22	4	1	1	3	2	0	1
1116888	1	0	1.4	0	2	1	2	4						0	0	2	1640	0	7	3	2015-04-22	1	2015-04-22	2	1	1	3	1	0	0
1116974	1	0	2.8	1	3	24	2	3	2	5	7			0	0	19	17502	0	1	1	2015-04-22	1	2015-04-22	2	1	1	3	2	0	1
1118604	1	0	2.3	1	3	14	2	1	1	3	2			0	0	28	25349	0	1	1	2016-01-04	4	2016-01-04	2	1	1	3	2	0	1
1119068	1	1	1.4	1	3	6	2	2						0	0	6	4256	0	1	1	2015-04-30	1	2015-04-30	1	1	2	3	2	0	1
1121035	1	0	5.8	1	3	20	3	3	2	2	5	1		0	0	11	16037	0	1	1	2015-05-06	1	2015-06-07	2	1	1	3	2	1	1
1125122	1	0	0.9	1	2	18	3	1	2	3	5			1	0	21	14930	0	1	1	2015-05-20	1	2015-05-20	1	1	1	3	2	0	1
1126075	1	1	16	0	1	31	3	7	3	2				0	0	12		0	3	1	2015-05-24	1	2015-05-24	3	1	1	3	2	0	1
1126085	1	0	16	1	1	15	2	1	4	8				0	0	22	11511	1	3	1	2015-05-24	1	2015-05-24	2	1	1	3	2	0	1
1126086	1	0	0.3	0	1	7	3	1	3					0	0	8	1983	0	3	3	2015-02-24	4	2015-05-25	4	1	1	3	2	1	1
1126854	1	0	1.2	1	3	7	3	6	7					0	0	8	2481	0	1	1	2015-05-26	1	2015-05-26	2	1	1	2	2	0	1
1128103	1	0	1.6	1	3	1	3	4						0	0	12	4074	0	3	1	2015-05-31	1	2015-05-31	2	1	1	2	2	0	1
1129710	1	0	3.2	1	3	33	3	2	2	5	3	7	7	1	0	39	70049	0	1	1	2015-06-01	2	2015-06-05	2	1	1	3	3	0	1
1129813	1	0	4.8	1	2	3	3	4	4					1	0	6	4481	0	1	1	2015-06-01	2	2015-06-05	2	1	1	4	2	1	1
1129840	1	1	2.4	0	3	10	3	2	3					0	0	11	6939	0	1	1	2016-06-05	2	2016-06-05	2	2	2	1	2	0	1
1132115	1	1	16	1	3	30	4	3	2	5	7			0	0	24	35392	0	7	3	2015-06-13	2	2015-06-14	2	1	1	3	2	0	0
1133079	1	1	1.3	0	3	10	3	3	3	2	1			0	0	23	11287	0	1	1	2015-06-16	2	2015-06-16	2	1	1	3	2	0	1
1133816	1	1	0.7	0	2	18	3	3	3	1	2			1	0	6	6658	0	1	1	2015-06-19	2	2015-06-19	1	1	1	3	2	0	1
1134945	1	0	0.7	0	1	8	3	3	3	2				0	0	10	3729	0	1	1	2015-06-23	2	2015-06-23	4	1	1	3	2	0	1
1135986	1	0	6	1	3	42	4	2	5	3	7	7		0	0	31	56545	0	1	1	2015-06-24	2	2015-06-26	2	1	1	3	2	0	1
1137540	1	0	7	1	3	6	3	3						0	0	7	5681	0	3	3	2015-07-02	2	2015-07-02	2	1	1	3	2	0	1
1140371	1	0	1.3	0	3	10	3	1	2					0	0	4		0	1	1	2015-07-10	2	2015-07-10	2	1	1	2	2	0	1
1140382	1	1	1.3	1	2	15	3	1	3	7				0	0	5	2967	0	7	3	2015-07-10	2	2015-07-10	2	1	1	3	2	0	0
1140784	1	1	8	0	1	9	2	2	7					0	0	2	1485	0	1	1	2015-07-12	2	2015-07-12	2	1	1	3	2	0	1
1141904	1	0	1.3	0	2	6	2	6	7					0	0	5	2406	0	1	1	2015-07-15	2	2015-07-15	2	1	1	3	2	0	1
1143419	1	0	4.4	1	3	1	4	4						0	0	9	3036	0	7	3	2015-07-20	2	2015-07-20	2	1	1	3	2	0	0
1144395	1	0	0.7	0	2	2	3	4						0	0	7	3420	0	2	1	2015-07-19	2	2015-07-23	2	4	1	1	2	1	1
1146370	1	0	11	1	3	27	3	1	1	3	7			0	0	19	13461	0	3	3	2015-07-28	2	2015-07-30	2	1	1	3	2	0	1
1147475	1	0	3.8	1	3	11	3	1	1	3				0	0	36	21417	0	7	3	2015-08-03	2	2015-08-03	2	1	1	3	2	0	0
1147503	1	0	17	1	1	3	4	4						0	1	39	19935	0	7	3	2015-08-01	2	2015-08-03	4	1	2	1	3	1	0
1149564	1	0	4.8	1	3	18	4	4	8	7	7			0	0	37	15403	0	3	3	2015-08-10	2	2015-08-10	2	1	1	3	2	0	1
1150201	1	1	3.9	1	3	15	2	1	2	3				0	0	15	6926	0	2	1	2015-08-12	2	2015-08-12	2	2	1	3	2	0	1
1151405	1	1	8	1	3	8	4	3	3	2	8			0	1	59	67733	0	7	3	2015-08-17	2	2015-08-17	2	1	1	3	2	0	0
1151574	1	1	1.3	0	3	3	4	8						0	0	8	3550	0	1	1	2015-08-14	2	2015-08-18	2	1	1	3	2	0	1
1154224	1	0	2	1	3	10	3	1	2	3				0	0	10	4780	0	2	1	2015-08-27	2	2015-08-27	2	2	1	3	2	0	1
1155495	1	0	1.5	1	3	9	3	2	5	7	7			0	0	19	9971	0	1	1	2015-09-02	3	2015-09-02	2	1	1	3	2	0	1
1155788	1	0	0.9	1	3	23	3	1	2	3	7			0	0	25	18862	0	1	1	2015-09-02	3	2015-09-03	2	1	2	3	2	0	1
1155924	1	0	3.5	1	1	25	3	3	2	5	7			0	0	17	17516	0	6	1	2015-09-04	3	2015-09-04	2	2	1	3	2	0	1
1156024	1	0	5.8	1	2	3	3	1						0	0	11	3503	0	3	3	2015-09-04	3	2015-09-04	2	1	1	3	2	0	1
1156182	1	0	4.9	1	3	9	3	2	6	7				0	0	13	5526	0	1	1	2015-09-05	3	2015-09-06	2	1	1	3	2	1	1
1156905	1	0	1.5	1	3	8	2	2	2	1	3			0	0	7	4640	0	1	1	2015-09-07	3	2015-09-07	2	1	1	2	2	0	1
1158305	1	0	2.4	1	3	10	3	7						0	0	15	13822	0	1	1	2015-09-13	3	2015-09-14	2	1	1	3	2	0	1
1158988	1	0	4.9	1	3	27	3	1	1	4	3	2	7	1	1	55	54038	1	3	3	2015-09-12	3	2015-09-15	2	1	1	4	2	1	1
1163045	1	0	2.8	0	3	11	4	1	4					0	0	3	886	0	3	1	2015-10-05	3	2015-10-05	2	1	1	3	2	0	1
1163320	1	1	1	0	2	2	3	2						0	0	3	1155	0	6	1	2015-10-02	3	2015-10-06	2	1	1	3	2	0	1
1164662	1	0	1.8	1	3	9	3	1	2	2				0	0	5	1713	0	1	1	2015-09-25	3	2015-10-10	2	1	1	1	2	0	1
1166101	1	0	1.5	0	1	1	3	8						0	0	1	928	0	1	1	2015-10-13	3	2015-10-16	2	1	1	3	2	0	1
1166346	1	0	8	1	3	4	2	1						0	0	5	1778	0	3	1	2015-10-17	3	2015-10-17	2	1	1	3	1	0	1
1168421	1	0	1.8	0	1	15	3	7	7	7	7			0	0	4	5376	0	1	1	2015-10-25	3	2015-10-25	2	1	1	3	2	0	1
1168600	1	0	12	1	3	1	2	9						0	0	3	454	0	7	1	2015-10-25	3	2015-10-26	2	1	1	3	1	1	0
1170090	1	1	1.3	0	3	5	3	3						0	0	10	4717	0	1	1	2015-10-26	3	2015-10-31	2	1	2	3	2	0	1
1176039	1	0	13	1	2	2	4	3						0	0	3	872	0	7	2	2015-11-16	3	2015-11-23	2	1	1	3	2	0	0
1176387	1	0	0	1	3	23	3	1	2	5	8			0	0	15	12900	0	1	1	2015-11-24	3	2015-11-25	4	1	2	3	2	1	1
1176642	1	0	0.9	1	2	6	2	2	3	2				0	0	2	1610	0	1	1	2015-11-25	3	2015-11-25	4	1	1	3	2	0	1
1177828	1	0	1.6	0	1	4	3	1						0	0	2	676	0	1	1	2015-11-30	3	2015-11-30	1	2	1	3	2	0	1
1178175	1	0	9	1	3	4	3	1						0	0	6	2382	1	3	1	2015-12-01	4	2015-12-01	2	1	1	3	2	0	1
1178435	1	0	4.5	0	1	4	2	7						1	0	12	4090	0	1	1	2015-11-18	3	2015-11-18	2	1	1	3	2	0	1
1179225	1	0	2	1	3	8	3	3	2	5	7			0	0	8	4486	0	1	1	2015-12-06	4	2015-12-06	2	1	1	3	2	0	1
1180019	1	1	0.8	1	3	8	3	3	2					0	0	13	7244	0	1	1	2015-12-09	4	2015-12-09	4	1	1	3	2	0	1
1180783	1	0	1.3	1	3	6	3	1	2					0	0	20	10285	0	1	1	2015-12-11	4	2015-12-11	2	1	1	3	2	0	1
1181237	1	1	9	0	2	3	3	7	8					1	1	8	8266	0	1	1	2015-12-01	4	2015-12-14	3	1	1	4	2	1	1
1181942	1	0	0.9	0	3	2	3	4						0	0	19	8861	0	6	1	2015-12-04	4	2015-12-16	2	1	1	3	2	1	1
1182709	1	0	1.6	1	1	7	3	1						0	0	5	2346	0	1	1	2015-12-20	4	2015-12-20	4	1	2	3	2	0	1
1183080	1	0	1	1	3	3	2	1	2					0	0	4	1761	0	1	1	2015-12-21	4	2015-12-21	2	1	2	1	1	0	1
1183099	1	0	13	1	3	43	4	7	7	3	3	2	6	0	1	83	350774	0	3	1	2015-12-22	4	2015-12-22	2	1	2	3	2	0	1
1183358	1	0	3.7	1	3	6	2	2	5	7				0	0	3	1647	0	1	1	2015-12-22	4	2015-12-22	2	1	1	3	1	0	1
1183631	1	0	6.8	1	1	3	2	5	6					0	0	2	1000	0	1	1	2015-12-23	4	2015-12-23	2	1	2	3	1	0	1
1184120	1	0	3	1	3	12	3	3	2	5	7			0	0	5		0	1	1	2015-12-23	4	2015-12-25	2	1	1	1	2	1	1
1184267	1	1	0.9	1	1	3	3	1	9					0	0	2	815	0	7	1	2015-12-26	4	2015-12-26	2	1	1	3	2	0	0
1185876	1	1	7	1	3	2	3	1	8					0	0	4	1377	0	3	3	2016-01-03	4	2016-01-03	2	1	1	3	1	0	1
1185889	1	0	4.8	1	3	8	3	3	5	7				0	0	7	6866	0	1	1	2015-12-23	4	2015-12-23	2	1	1	3	2	0	1
1186332	1	1	4.9	1	3	2	3	1						0	0	6	2673	0	6	1	2016-01-04	4	2016-01-05	2	1	1	3	2	1	1
1186620	1	0	4.3	0	3	7	3	7	7					0	0	6	3710	0	1	1	2016-01-02	4	2016-01-05	2	1	1	1	2	1	1
1186646	1	0	0.4	1	1	2	2	5						0	0	4	1199	0	6	1	2016-01-05	4	2016-01-05	4	1	2	3	1	0	1
1187476	1	0	0.9	0	1	1	4	4						0	0	7	2908	0	3	1	2016-01-08	4	2016-01-08	2	1	1	3	2	0	1
1187571	1	1	15	1	3	4	4	1	2	4				0	0	39	27181	0	7	3	2016-01-08	4	2016-01-08	4	1	1	3	2	0	0
1187884	1	1	9	1	3	16	3	1	2					0	0	9	7825	0	1	1	2016-01-10	4	2016-01-10	2	1	1	3	2	0	1
1189626	1	0	11	1	3	2	3	4						0	0	3	975	0	5	3	2016-01-09	4	2016-01-15	2	1	1	3	2	1	0
1190287	1	0	0.3	0	3	16	3	2	5	7				0	0	14	20876	0	1	1	2016-01-07	4	2016-01-08	4	1	2	3	2	0	1
1190296	1	1	0.8	1	3	3	3	8						0	0	14	7611	0	1	1	2016-01-17	4	2016-01-18	2	1	1	3	2	0	1
1190441	1	0	6	0	3	8	4	1	1	4				0	0	16	53920	1	3	3	2016-01-18	4	2016-01-19	4	1	1	3	2	0	1
1190988	1	0	1.9	0	3	3	2	1	1					0	0	12	4362	0	1	1	2015-11-04	3	2015-11-04	2	1	1	3	1	0	1
1191853	1	1	1.5	1	2	16	3	7	2					0	0	5	5416	0	1	1	2016-01-24	4	2016-01-24	1	1	1	3	2	0	1
1192784	1	0	0.5	1	3	6	3	7						0	0	9	7379	0	1	1	2016-01-22	4	2016-01-27	4	1	2	3	2	1	1
1193045	1	0	2.3	1	3	16	3	7	2					0	0	9	11445	0	1	1	2016-01-27	4	2016-01-27	4	1	2	3	2	0	1
1193503	1	0	2.4	1	1	3	2	1	2					0	0	3	1228	0	1	1	2016-01-28	4	2016-01-29	4	1	2	2	2	0	1
1193731	1	0	2.5	1	3	17	4	2	5	7				0	0	16	10516	0	1	1	2016-01-18	4	2016-01-30	2	1	1	1	2	1	1
1194439	1	1	1.3	1	3	11	2	7	7	8				0	0	21	22829	0	1	1	2016-02-03	4	2016-02-03	2	1	1	3	2	0	1
1194611	1	0	8	1	3	7	3	1						0	0	6	3106	1	3	3	2016-02-02	4	2016-02-03	2	1	1	3	2	0	1
1194614	1	1	1.8	1	3	6	2	3	4	4	4			0	0	9	8600	0	1	1	2016-02-02	4	2016-02-03	2	1	1	1	2	1	1
1195063	1	0	3	0	1	3	3	1						0	0	4	2947	0	3	1	2016-02-06	4	2016-02-07	2	1	1	1	2	1	1
1195330	1	0	4	1	3	8	3	2	5					0	0	9	7430	0	1	1	2016-02-08	4	2016-02-09	2	1	2	1	2	0	1
1195983	1	0	2.4	1	1	10	4	2	7					0	1	24	13247	0	1	1	2016-02-05	4	2016-02-12	2	1	1	3	2	0	1
1196003	1	0	7	1	3	4	3	1	1					0	0	5	2440	1	3	3	2016-02-12	4	2016-02-12	2	1	1	3	2	0	1
1197051	1	0	14	1	2	3	2	1	7					0	0	4	2387	0	7	3	2016-02-14	4	2016-02-15	2	1	1	3	2	1	0
1197876	1	1	4	0	3	1	2	9						0	0	18	3386	0	7	1	2016-02-17	4	2016-02-17	2	2	1	3	1	0	0
1198276	1	0	8	1	3	5	2	1	4					0	0	4	2031	0	3	1	2016-02-18	4	2016-02-18	3	1	2	3	2	0	1
1200136	1	1	1.1	1	1	2	2	4						0	0	5	2510	0	1	1	2016-02-24	4	2016-02-24	2	1	1	3	1	0	1
1200876	1	1	6	0	3	7	3	7						0	0	6	11001	0	1	1	2016-02-12	4	2016-02-27	2	1	1	4	2	1	1
1200983	1	0	11	0	3	20	4	4	5	7	7			0	0	2	997	0	1	1	2016-02-02	4	2016-02-27	3	1	1	3	2	0	1
1201011	1	0	2.2	0	3	3	2	1						0	0	3	1595	0	7	3	2016-02-22	4	2016-02-27	2	1	2	1	2	0	0
1201603	1	1	2.1	0	3	10	3	7						1	0	5	5526	0	1	1	2016-02-25	4	2016-02-29	2	1	1	1	2	1	1
1201652	1	0	1	0	3	29	4	1	3	2				0	0	17	18616	0	1	1	2016-02-09	4	2016-02-19	4	1	1	3	2	0	1
1202529	1	0	12	1	3	1	3	1						0	0	2	1265	0	3	1	2016-03-02	1	2016-03-03	2	1	1	3	2	1	1
1202649	1	0	4.1	0	3	5	4	1	4	4				0	0	21	3970	0	5	1	2016-03-03	1	2016-03-03	2	1	1	3	2	0	0
1202816	1	0	2.6	1	3	10	3	1	2					0	0	3	2026	0	1	1	2016-03-03	1	2016-03-04	2	1	1	3	2	1	1
1202928	1	1	0.9	1	3	4	2	1	1					0	0	3	1448	0	1	1	2016-03-04	1	2016-03-04	2	1	1	3	2	0	1
1203204	1	0	4.1	0	3	6	3	7						0	0	15	9044	0	1	1	2016-02-26	4	2016-03-06	2	1	1	1	2	1	1
1204325	1	1	3.3	1	3	2	3	1						0	0	6	2930	0	5	1	2016-03-09	1	2016-03-09	2	1	2	3	2	0	0
1204666	1	0	1.3	0	3	20	3	2	5	3	3	7	7	1	0	4	9202	0	1	1	2016-03-10	1	2016-03-10	2	1	1	3	2	0	1
1205098	1	1	3.5	0	3	3	3	1						0	0	2	1310	0	1	1	2016-03-11	1	2016-03-12	2	1	1	3	2	1	1
1205239	1	0	1.4	1	3	20	3	2	7	8	7	8		0	0	21		0	1	1	2016-03-13	1	2016-03-13	1	1	2	3	2	0	1
1206936	1	0	0.8	0	3	7	3	2	3					0	0	11	9618	0	1	1	2016-03-18	1	2016-03-19	4	1	2	3	2	0	1
1207216	1	1	8	0	3	2	4	7						0	1	33	27245	0	3	1	2016-03-20	1	2016-03-20	2	1	1	3	2	0	1
1208561	1	0	6	1	3	8	4	4	7	8	8			1	1	68	64608	0	7	3	2016-03-24	1	2016-03-24	2	1	1	3	3	0	0
1208803	1	1	5.1	1	1	8	3	1						0	0	19	33147	0	3	1	2016-03-24	1	2016-03-25	2	1	1	3	2	1	1
1208804	1	0	3.5	0	1	1	2	1						0	0	3	700	0	3	1	2016-03-25	1	2016-03-25	2	1	1	3	2	0	1
1208948	1	0	2.5	0	3	20	3	2	5	3	7			1	0	8		0	1	1	2016-03-21	1	2016-03-26	2	1	1	1	2	0	1
1209099	1	0	0.8	1	3	4	2	1						0	0	5	1943	0	1	1	2016-03-27	1	2016-03-27	1	1	1	3	1	0	1
1209534	1	1	1.6	1	3	3	2	1	1	2				0	0	2	1220	0	1	1	2016-03-29	1	2016-03-29	1	1	1	3	1	0	1
1210808	1	0	0.2	1	3	4	2	1						0	0	3	1427	0	6	1	2016-04-03	1	2016-04-04	4	1	1	3	2	1	1
1211092	1	1	1.3	0	3	19	3	1	2	7				1	0	16	13619	0	1	1	2016-04-04	1	2016-04-04	2	1	1	3	2	0	1
1214676	1	0	17	1	3	10	4	4	8					1	1	29	37898	0	3	3	2016-04-17	1	2016-04-17	2	1	1	3	2	0	1
1215448	1	0	1.2	1	1	2	2	4						0	0	7	3727	0	1	1	2016-04-20	1	2016-04-20	2	1	1	3	2	0	1
1215969	1	0	3.4	1	2	5	3	7						0	0	5	44398	0	1	1	2016-04-18	1	2016-04-21	2	1	1	4	2	1	1
1222084	1	0	1.6	1	2	4	2	3						0	0	2	2353	0	1	1	2016-05-15	1	2016-05-15	2	1	1	3	1	0	1
1224471	1	0	12	1	3	5	4	4	3	2	8			0	1	71	68149	0	7	1	2016-05-22	1	2016-05-23	2	1	1	3	3	0	0
1228853	1	1	2.4	1	3	18	3	1	1	2				0	0	4	2759	0	1	1	2016-06-08	2	2016-06-09	2	1	1	3	2	0	1
1231700	1	1	4.2	1	1	1	2	9						0	0	3	392	0	7	3	2016-06-20	2	2016-06-20	2	1	1	3	1	0	0
1232663	1	1	1	1	3	10	3	2	7					0	0	13	6869	0	1	1	2016-06-18	2	2016-06-23	1	1	1	3	2	0	1
1232744	1	0	6	0	2	6	3	2	2					0	0	8	5596	0	1	2	2016-06-23	2	2016-06-23	1	1	1	3	2	0	1
1235206	1	0	8	1	3	1	4	4						0	0	9	4653	0	7	3	2016-07-03	2	2016-07-03	2	1	1	3	3	0	0
1237207	1	0	1.5	0	3	5	3	7	8					0	0	10	6867	0	1	1	2016-07-10	2	2016-07-10	2	1	1	3	2	0	1
1238274	1	1	1.3	0	3	4	3	4	5	7				0	0	8	6625	0	1	1	2016-07-12	2	2016-07-13	1	1	1	3	2	0	1
1239676	1	0	1.8	0	3	4	2	8						0	0	7	4995	0	1	1	2016-07-15	2	2016-07-18	2	1	1	3	1	0	1
1240310	1	1	5.4	1	3	21	3	5	7	2				0	0	8	11354	0	1	1	2016-07-15	2	2016-07-20	2	1	1	3	2	0	1
1242323	1	0	7	0	3	6	3	2						0	0	5	3451	0	1	1	2016-07-27	2	2016-07-27	4	1	1	3	2	0	1
1246092	1	0	1.4	0	3	10	3	5	7					0	0	14	20469	0	1	1	2016-08-05	2	2016-08-10	2	1	1	3	2	0	1
1248991	1	1	4.5	0	3	2	4	8						0	0	11	14959	0	6	1	2016-08-20	2	2016-08-21	2	1	1	3	2	0	1
1250883	1	0	13	1	2	90	4	1	1	2	5	7		0	0	2	23258	1	7	3	2016-08-28	2	2016-08-28	2	1	2	3	4	0	0
1251762	1	0	0.8	1	3	3	2	1	1					0	0	2	1606	0	1	1	2016-08-31	2	2016-08-31	4	1	1	3	1	0	1
1252388	1	0	1.1	1	3	5	2	7						1	0	10	9089	0	1	1	2016-09-01	3	2016-09-03	2	1	1	3	1	0	1
		0
		0
		0
		0
		0
		0
		0
		0
		0
		0
		0
		0
		0
		1
		0
		0
		0
		0
		0
		0
		0
		0
		1
		0
		1
		0
		0
		0
		0
		0
		0
		0
		0
		0
		1
		1
		0
		0
		0
		1
		0
		0
		0
		1
		0
		0
		0
		0
		0
		0
		0
		0
		0
		0
		0
		0
		0
		1
		0
		1
		0
		1
		0
		0
		0
		0
		0
		0
		0
		0
		0
		0
		0
		0
		1
		0
		0
		0
		0
		1
		0
		0
		0
		0
		1
		0
		0
		0
		1
		0
		0
		0
		0
		0
		0
		0
		0
		0
		0
		0
		1
		0
		0
		0
		0
		1
		0
		0
		1
		0
		0
		0
		0
		1
		0
		0
		0
		0
		0
		1
		0
		0
		0
		0
		0
		0
		0
		0
		0
		0
		1
		0
		0
		0
		1
		0
		0
		0
		0
		0
		0
		0
		0
		0
		0
		0
		0
		0
		0
		0
		0
		0
		0
		1
		1
		1
		0
		0
		1
		0
		0
		0
		1
		0
		0
		0
		0
		1
		0
		0
		0
		0
		1
		0
		0
		0
		1
		0
		0
		0
		1
		0
		0
		1
		0
		0
		0
		1
		1
		0
		0
		1
		0
		0
		0
		1
		0
		0
		0
		0
		0
		0
		0
		0
		0
		1
		0
		0
		0
		0
		1
		1
		0
		0
		1
		1
		0
		0
		0
		0
		0
		0
		0
		1
		0
		0
		0
		0
		1
		0
		0
		0
		0
		0
		0
		1
		1
		0
		1
		1
		0
		0
		0
		0
		1
		0
		0
		0
		0
		0
		0
		0
		0
		0
		1
		0
		0
		0
		0
		0
		0
		0
		0
		1
		0
		0
		0
		1
		0
		0
		0
		0
		0
		0
		0
		1
		1
		0
		0
		0
		1
		0
		0
		0
		0
		0
		0
		0
		0
		0
		0
		1
		0
		0
		0
		1
		0
		1
		1
		0
		1
		0
		0
		1
		0
		1
		0
		0
		0
		1
		0
		0
		0
		0
		1
		0
		0
		0
		1
		0
		0
		0
		1
		0
		0
		1
		0
		0
		1
		0
		0
		1
		0
		1
		0
		1
		0
		0
		1
		1
		1
		0
		1
		0
		1
		1
		0
		0
		0
		0
		1
		0
		0
		1
		0
		1
		0
		1
		1
		1
		1
		1
		0
		0
		0
		0
		0
		0
		0
		0
		0
		0
		0
		0
		0
		0
		0
		0
		0
		1
		0
		1
		1
		0
		0
		0
		0
		0
		0
		0
		0
		1
		1
		0
		0
		0
		0
		1
		0
		0
		0
		1
		0
		0
		0
		0
		1
		0
		0
		0
		1
		0
		1
		0
		0
		0
		0
		0
		0
		0
		0
		1
		0
		1
		0
		0
		0
		0
		0
		1
		0
		0
		0
		0
		0
		0
		1
		0
		0
		0
		1
		0
		0
		0
		0
		0
		0
		0
		1
		0
		0
		0
		0
		0
		0
		0
		0
		1
		0
		1
		0
		0
		0
		0
		0
		0
		0
		0
		1
		0
		0
		0
		1
		0
		1
		1
		0
		1
		1
		0
		0
		1
		0
		0
		1
		1
		1
		0
		1
		0
		1
		1
		1
		0
		1
		0
		0
		1
		1
		0
		1
		0
		0
		0
		0
		0
		0
		0
		0
		1
		0
		0
		0
		1
		0
		0
		0
		1
		1
		0
		0
		0
		0
		0
		0
		0
		1
		1
		0
		0
		1
		0
		0
		0
		0
		0
		0
		0
		0
		0
		1
		0
		0
		0
		0
		1
		0
		0
		0
		0
		0
		0
		1
		0
		1
		0
		1
		0
		0
		0
		0
		0
		0
		0
		0
		0
		0
		0
		0
